# Supplementary material for: Refining the Lagrangian approach for moisture source identification through sensitivity testing of assumptions using BTrIMS1.1
Source: Copernicus journal article supplement (doi:10.5194/gmd-19-1367-2026), 2026-02-12
Supplement: Supplementary file 1 [file gmd-19-1367-2026-supplement.pdf]

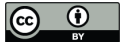

*Supplement of*

## **Refining the Lagrangian approach for moisture source identification through sensitivity testing of assumptions using BTrIMS1.1**

**Yinglin Mu et al.**

*Correspondence to:* Yinglin Mu ([yinglin.mu@unsw.edu.au](mailto:yinglin.mu@unsw.edu.au))

The copyright of individual parts of the supplement might differ from the article licence.

Section S1 Figures for synoptic features of the three events

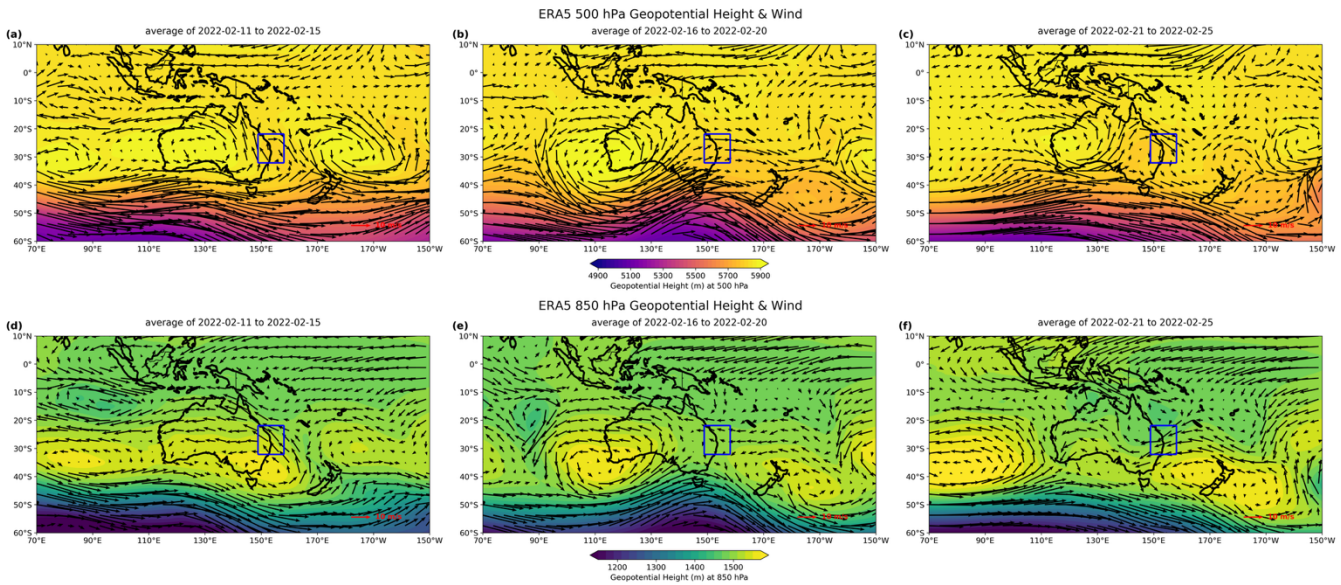

**Figure S 1** Average 500 hpa geopotential height (m) and wind field (a,b,c); and average 850 hpa geopotential height(m) and wind field (d,e,f) for 14 to 10 days(a,d), 9 to 5 days (b,e) and 4 to 0 days (c,f) before 25<sup>th</sup> Feb 2022.

# ERA5 500 hPa Geopotential Height & Wind

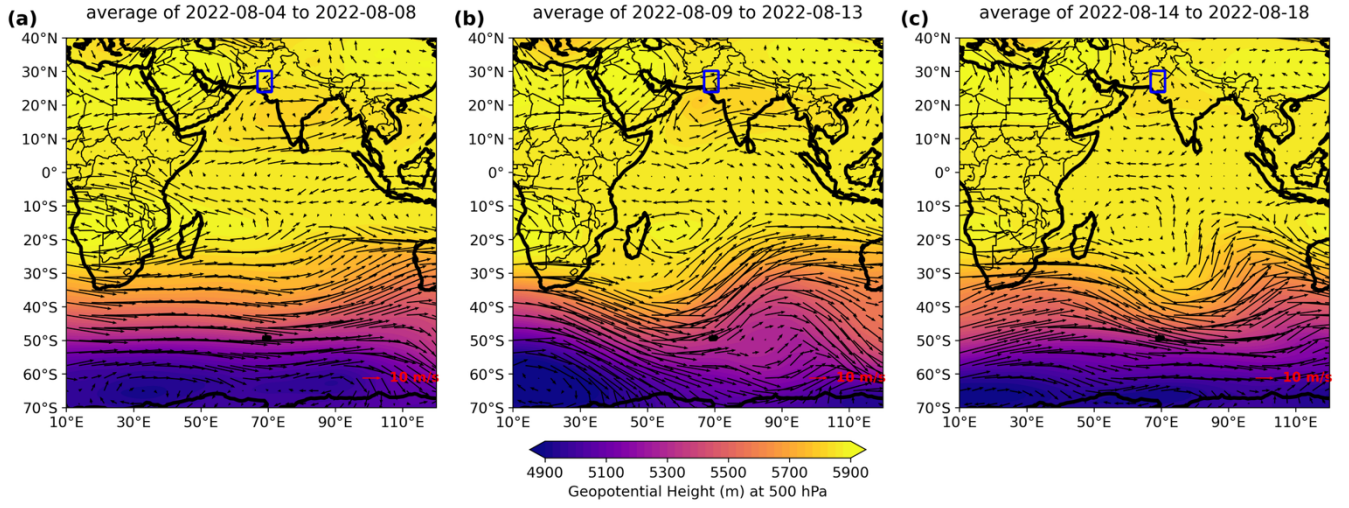

# ERA5 850 hPa Geopotential Height & Wind

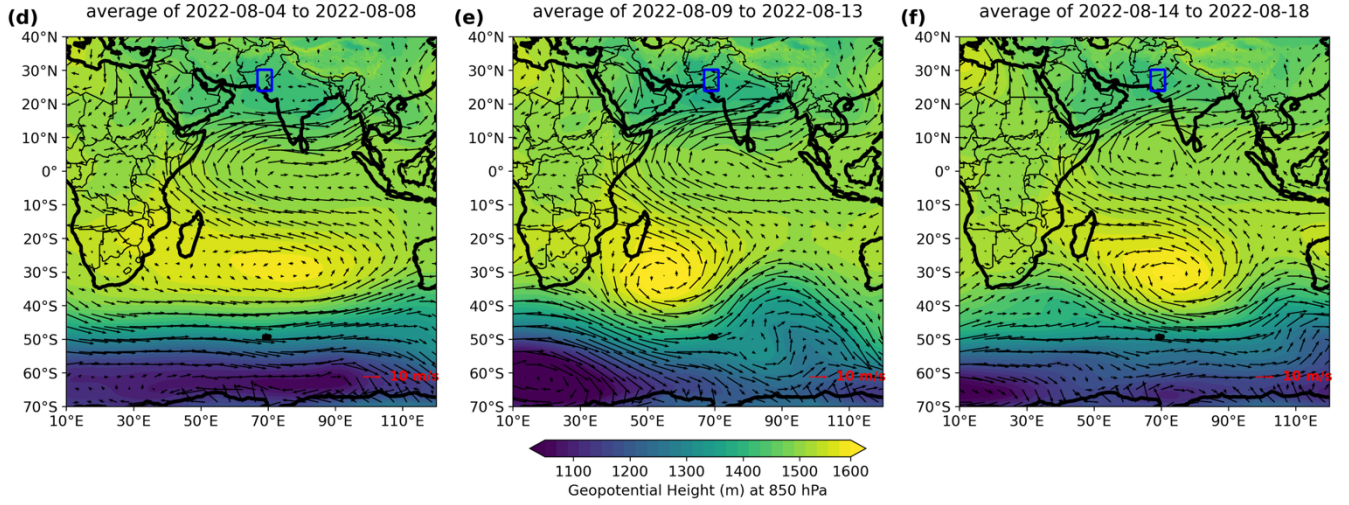

5

**Figure S 2** The same as Fig. S1, but for the Pakistan event.

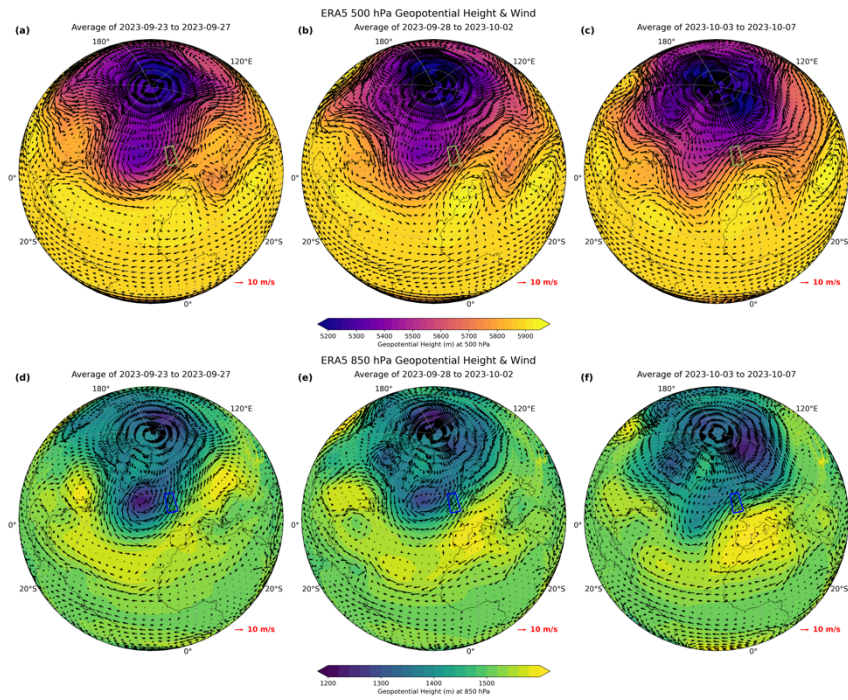

**Figure S 3** The same as Fig. S1, but for the Scotland event.

## Section S2 Moisture source result using standard Watersip method

10 To enable comparison of this study to other methods, here we show the results of using standard WaterSip method.



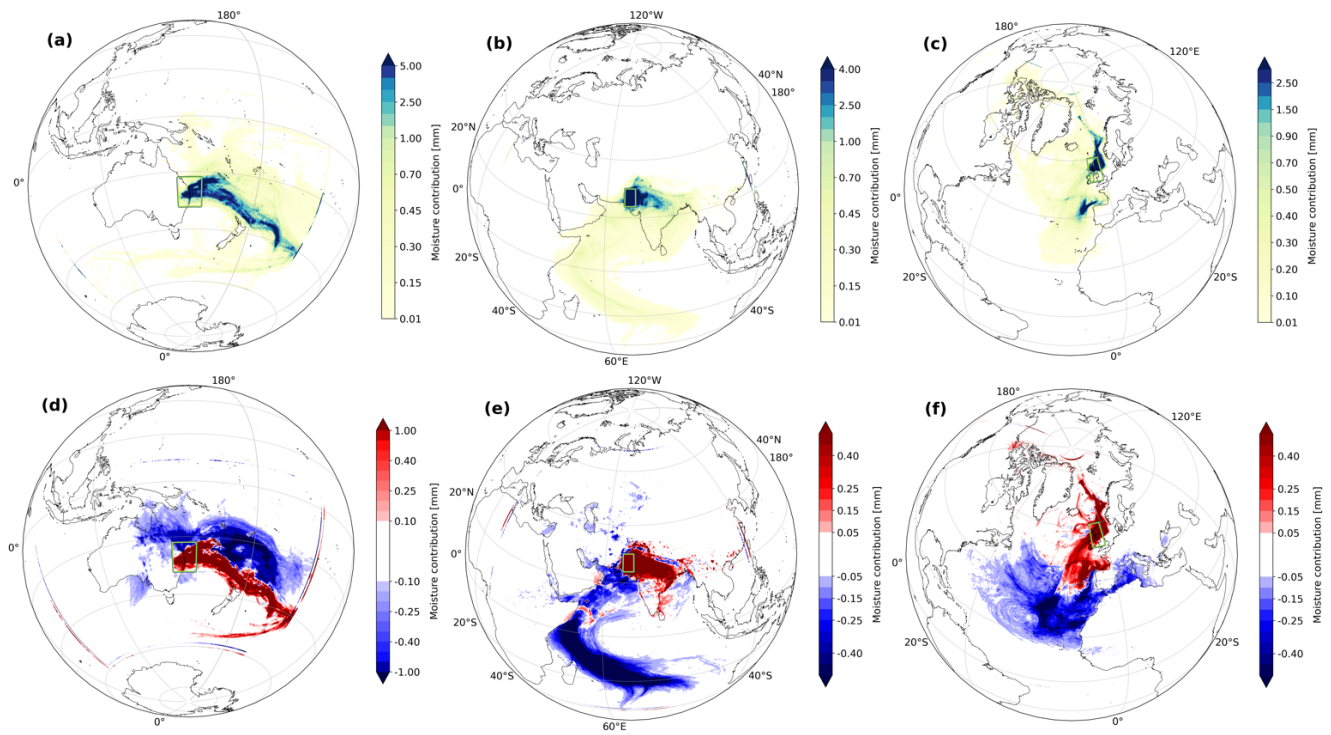

**Figure S 4** The results of standard WaterSip method for Australia (a), Pakistan(b) and Scotland(c) events;and the difference between it and Option1 (standard WaterSip – Option1) in panels (d–f).

### Section S3 Other figures

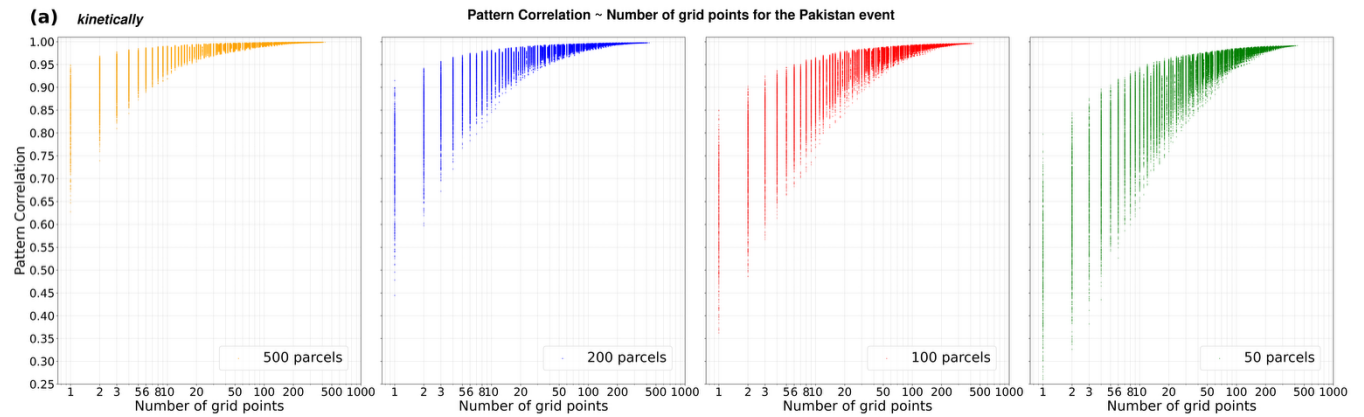

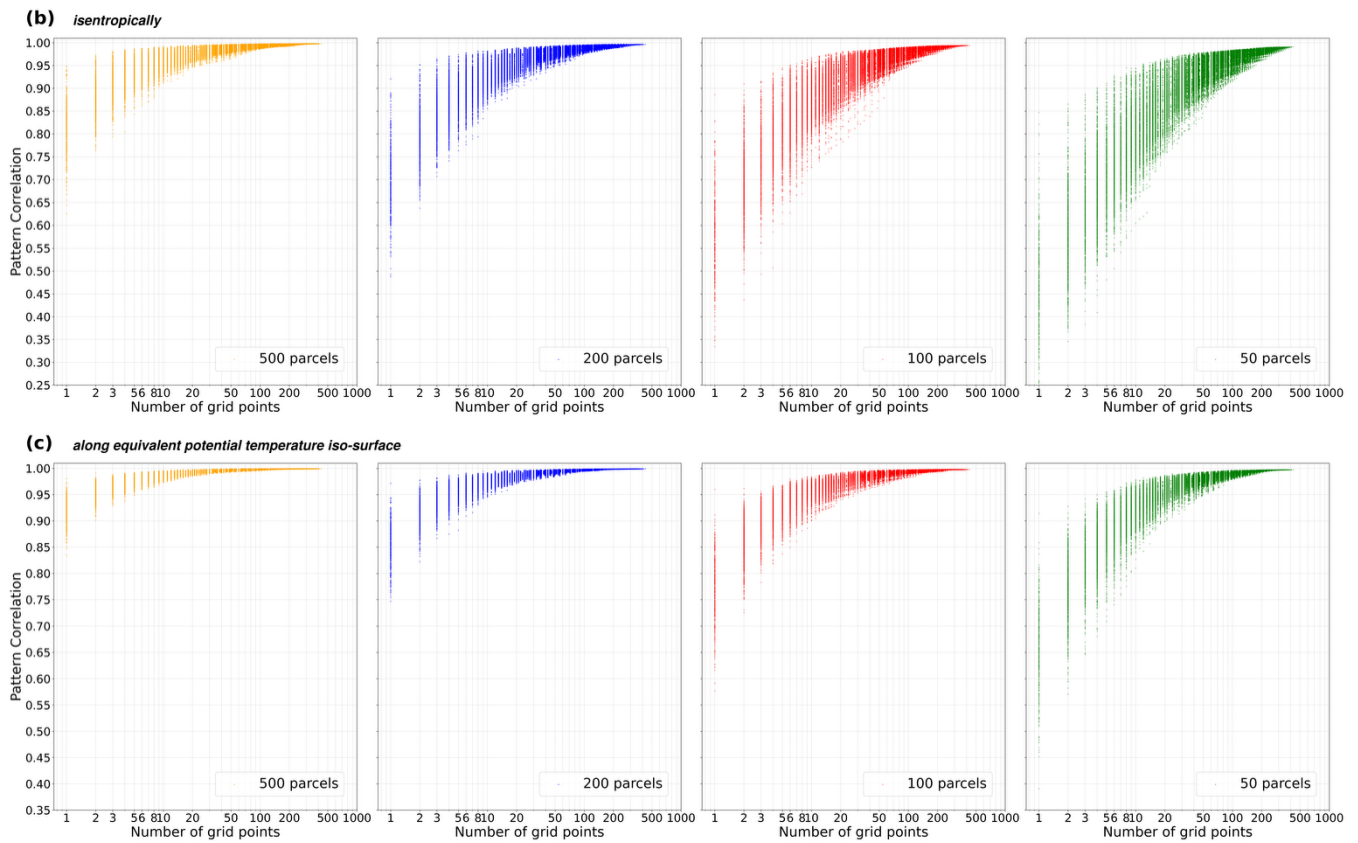

15 **Figure S 5** The same as Fig. 1 but for the Pakistan event.

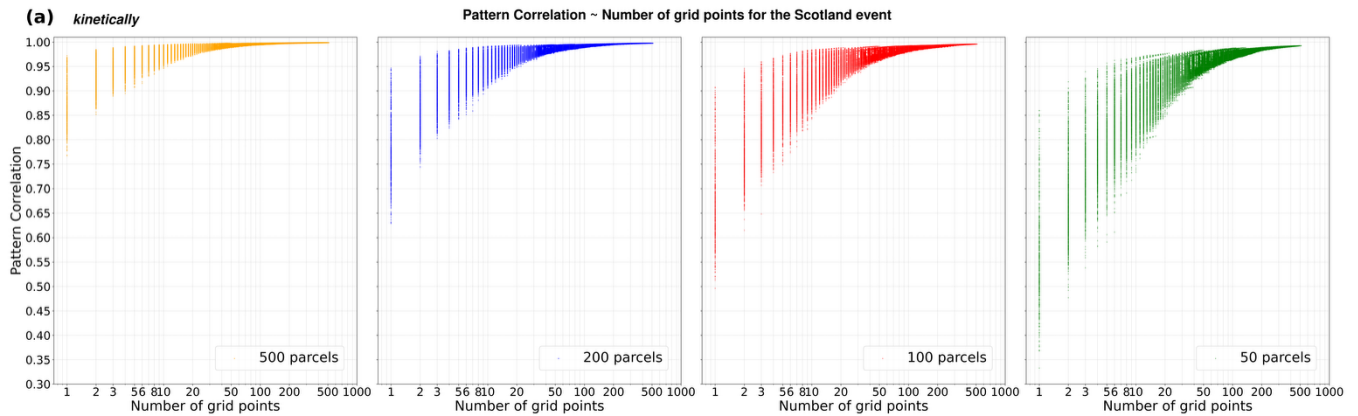

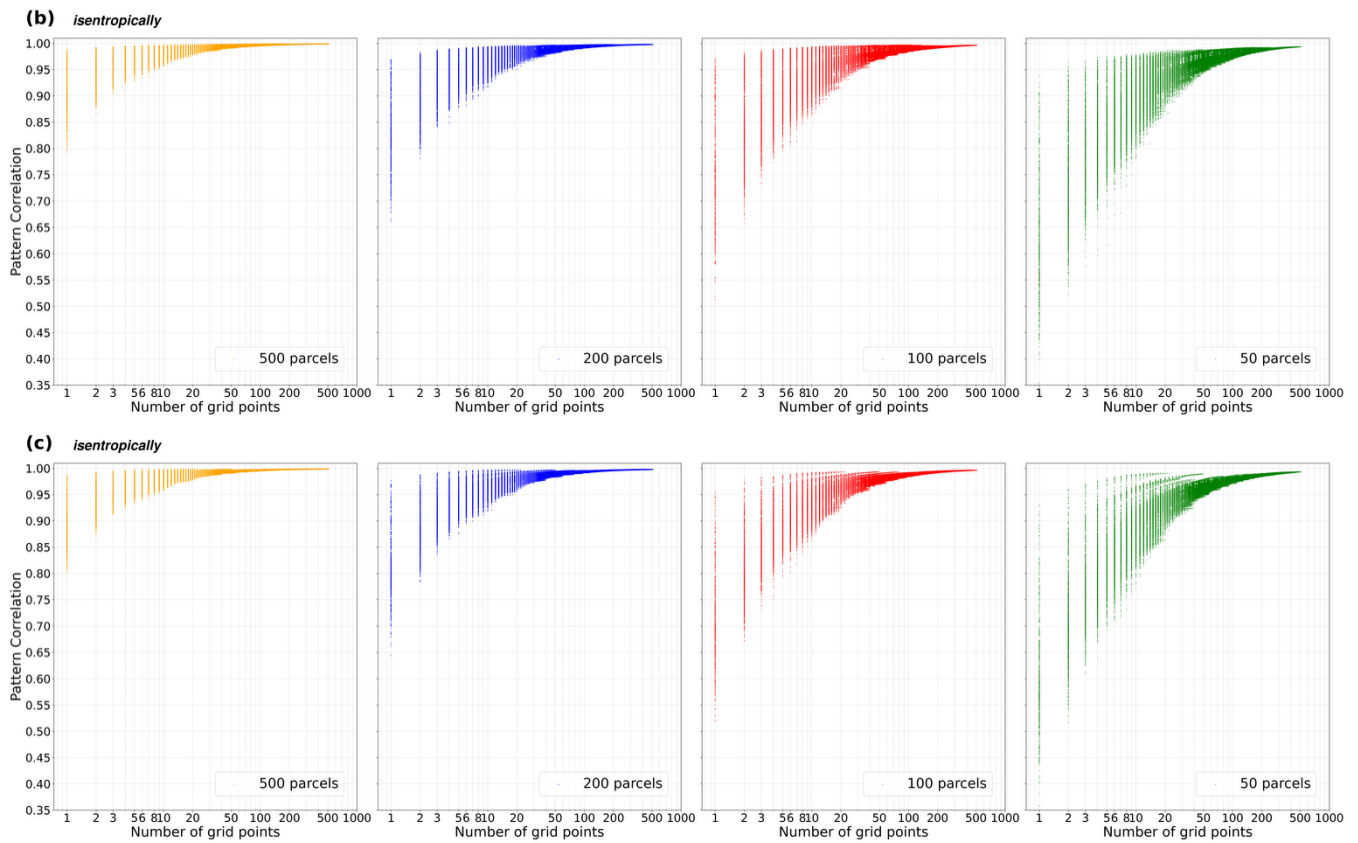

**Figure S 6** The same with Fig. 1 but for the Scotland event

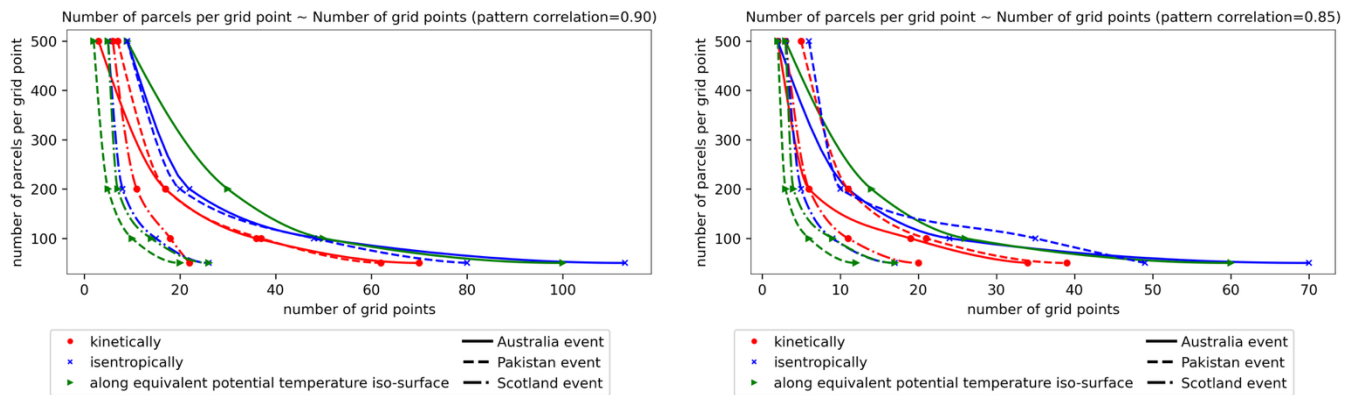

**Figure S 7** The same as Fig. 2 but for pattern correlation 0.90 (left) and 0.85 (right).

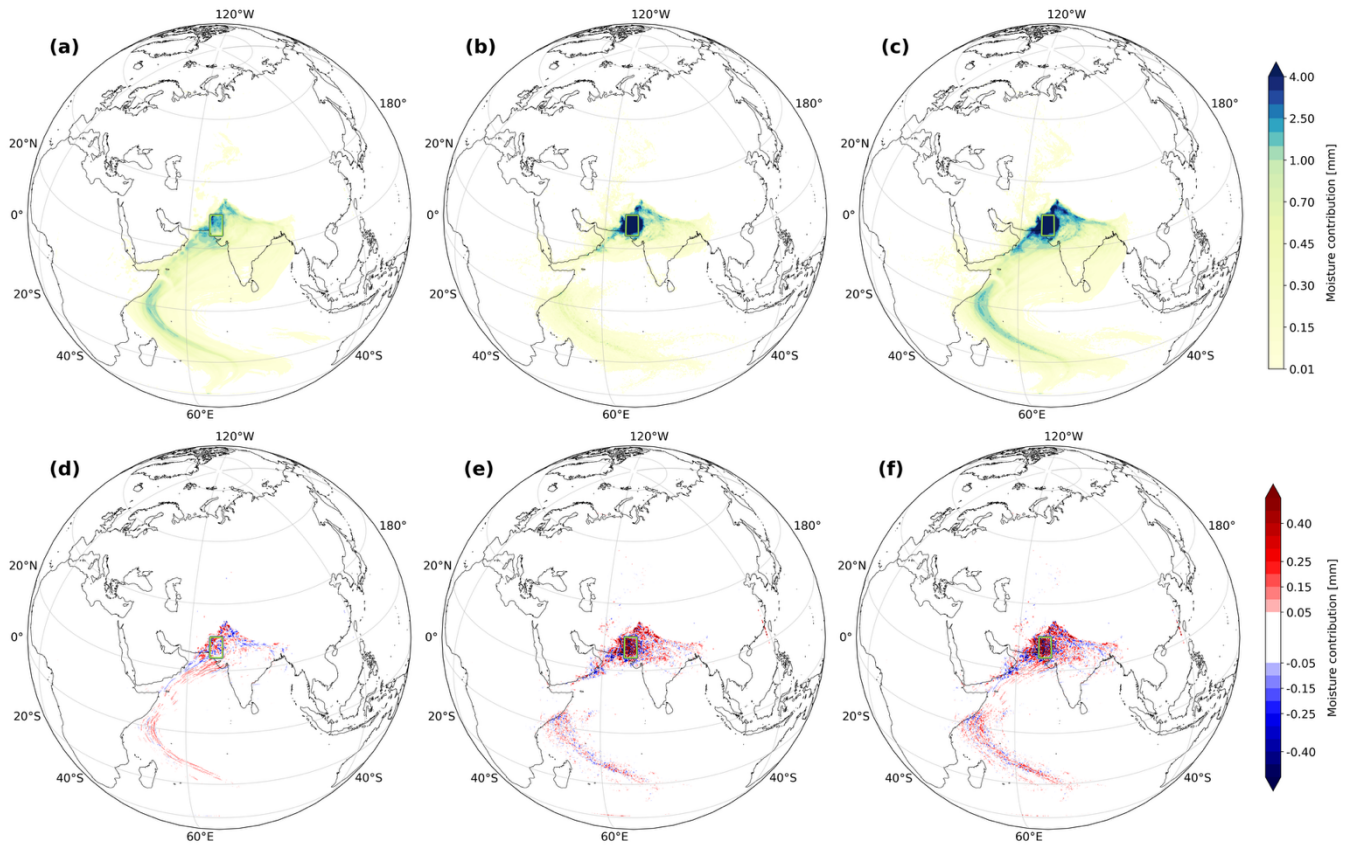

20 Figure S 8 The same as Fig. 6 but for the Pakistan event.



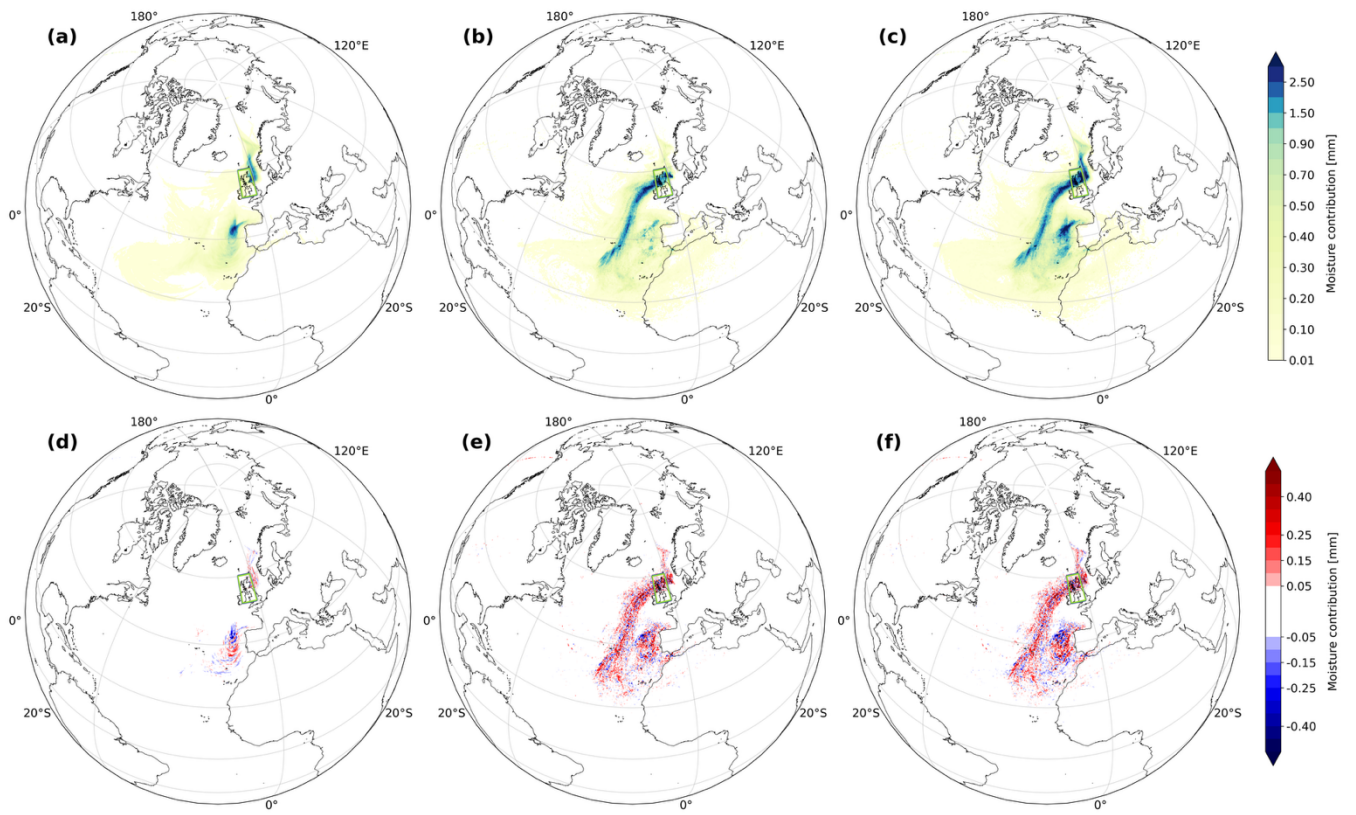

**Figure S 9** The same with Fig. 6 but for the Scotland event.

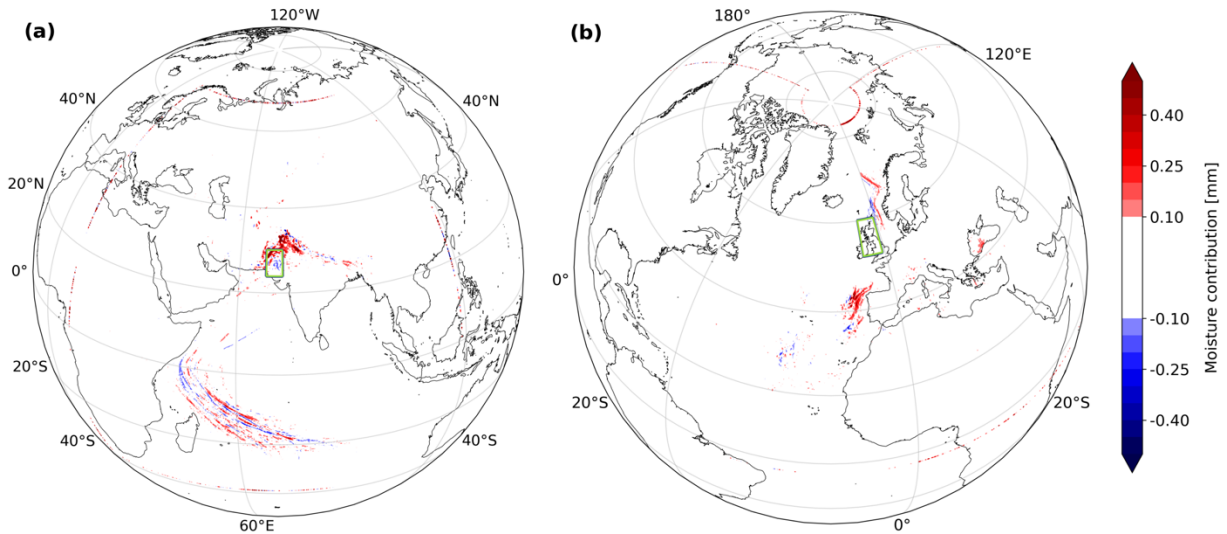

**Figure S 10** The same as Fig. 7 but for the Pakistan (a) and Scotland (b) events

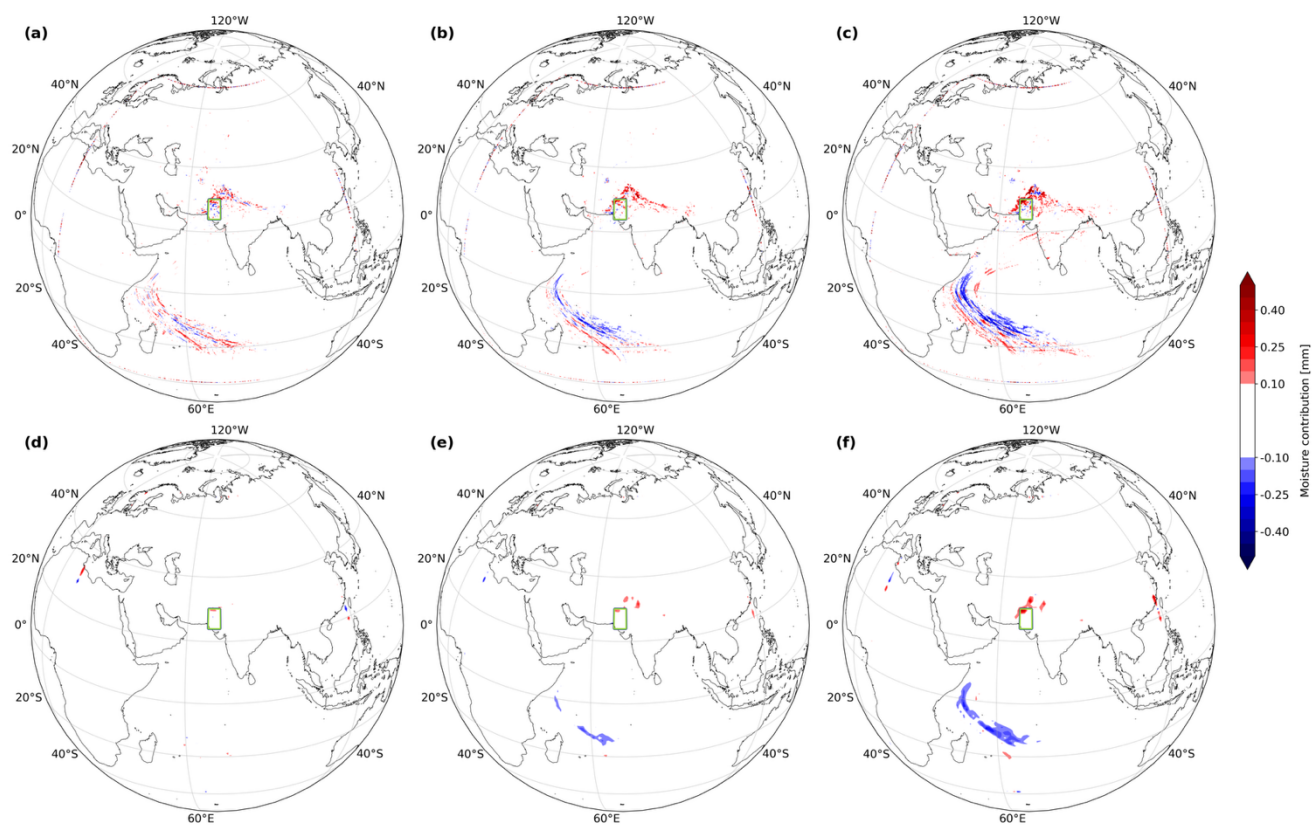

**Figure S 11** The same as Fig. 8 but for the Pakistan event.

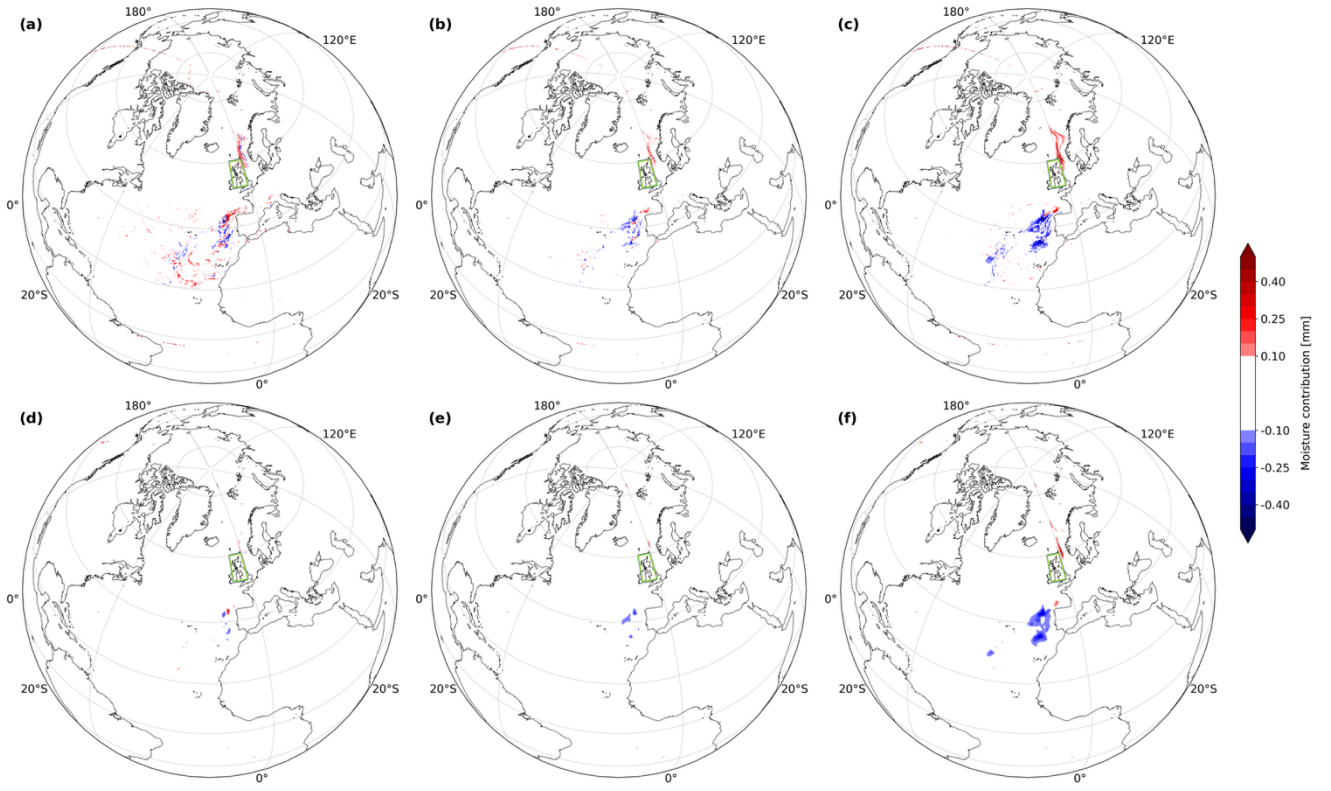

**Figure S 12** The same with Fig. 8 but for the Scotland event

## Section S4 Equations

The equation to calculate equivalent potential temperature used in this study:

$$\begin{aligned}
 es &= 611 \exp\left(\frac{17.2964 \times (T - 273.16)}{T - 35.86}\right) \\
 mix_s &= \frac{R_d}{R_v} \times \frac{es}{P - es} \\
 \theta_e &= T \times \frac{P_0}{P}^{\frac{R_d}{C_p + C_l \times mix_{tot}}} \times mix_s^{(-mix \times \frac{R_v}{C_p + C_l \times mix_{tot}})} \times \exp(L_v \times mix / (C_p + C_l \times mix_{tot}) \times T)
 \end{aligned} \tag{S1}$$

$es$ : saturation vapor pressure, Pa;

$T$ : air temperature, K;

$mix_s$ : saturated mixing ratio, kg/kg;

$P$ : air pressure, Pa;

$P_0$ : reference surface pressure, 1000hPa;

$C_p$ : heat capacity of air at constant pressure, 1004.67 (J/kgK);

$C_l$ : heat capacity of liquid water at  $\sim 20^\circ\text{C}$ , 4400 (J/kgK);

45  $mix$ : specific humidity of water vapor, kg/kg;

$mix_{tot}$ : specific humidity of total water, kg/kg;

$L_v$ : latent heat of vaporization of water, 2.25E6 (J/kg-1);

$R_d$ : ideal gas constant for dry air, 287.053 (J/kgK);

$R_v$ : gas constant of water vapor, 461.5 (J/kgK).

50
